# Supplementary material for: New horizons of MBenes: highly active catalysts for the CO oxidation reaction
Source: Royal Society of Chemistry journal article supplement (doi:10.1039/d2nr05705k), 2022-12-08
Supplement: d2nr05705k1.pdf [file d2nr05705k1.pdf]

## Supporting Information

# New Horizons of MBenes: Highly-active Catalysts for CO Oxidation Reaction

Bikun Zhang<sup>1,2</sup>, Jian Zhou<sup>1,2,\*</sup>, Zhimei Sun<sup>1,2,\*</sup>

<sup>1</sup> School of Materials Science and Engineering, Beihang University, Beijing 100191, China.

<sup>2</sup> Center for Integrated Computational Materials Engineering, International Research Institute for Multidisciplinary Science, Beihang University, Beijing 100191, China.

\* Corresponding authors: Jian Zhou (jzhou@buaa.edu.cn); Zhimei Sun (zmsun@buaa.edu.cn)

### ■ Computational Details

All the energy calculated in this work was investigated in the form of Gibbs free energy, which is determined as follows:

$$\Delta G = \Delta E + \Delta E_{\text{ZPE}} - T\Delta S \quad (\text{eq. S1})$$

where  $\Delta E$ ,  $\Delta E_{\text{ZPE}}$  and  $\Delta S$  represent the differences of total energy, zero-point energy and entropy between the products and reactants. In this work, temperature,  $T$ , was set to 298 K to study the COOR catalytic performance at room temperature. Zero-point energy,  $E_{\text{ZPE}}$ , was calculated using the equation:

$$E_{\text{ZPE}} = \sum_{i=1}^{3N} \frac{1}{2} h\nu_i \quad (\text{eq. S2})$$

where  $N$  represents the number of atoms of the adsorbates or isolated molecules,  $\nu_i$  is the vibrational

frequency of the normal mode obtained by the first-principle calculations, and  $h$  represents Planck's constant. Entropy,  $S$ , was calculated using the following equation:

$$S = \sum_{i=1}^{3N} \left[ -R \ln \left( 1 - e^{-\frac{h\nu_i}{k_B T}} \right) + \frac{N_A h \nu_i}{T} \frac{e^{-\frac{h\nu_i}{k_B T}}}{1 - e^{-\frac{h\nu_i}{k_B T}}} \right] \quad (\text{eq. S3})$$

where  $R$ ,  $N_A$  and  $k_B$  represent the universal gas constant, Avogadro's number and Boltzmann's constant, respectively. The entropy of  $O_2$ ,  $CO$  and  $CO_2$  gas at 298 K and 1 bar was listed in **Table S1**, obtained from NIST Chemistry WebBook.

The formation energy of oxygen functionalized group,  $\Delta G_f^O$ , was calculated as follows:

$$\Delta G_f^O = G_{M_2B_2O_2} - G_{M_2B_2} - 2\mu_O \quad (\text{eq. S4})$$

where  $G_{M_2B_2O_2}$  and  $G_{M_2B_2}$  represent the Gibbs free energy of  $M_2B_2O_2$  and  $M_2B_2$ , respectively.  $\mu_O$  is the chemical potential of oxygen, which is consumed to be half of the Gibbs free energy of  $O_2$  here in consideration of the air atmosphere. Negative value of  $\Delta G_f^O$  indicates spontaneous formation of oxygen functionalized group of  $M_2B_2O_2$ .

The formation energy of oxygen vacancy,  $\Delta G_f^{Va}$ , was calculated using the equation:

$$\Delta G_f^{Va} = G_{M_{18}B_{18}O_{18}} - G_{M_{18}B_{18}O_{17}} - \mu_O \quad (\text{eq. S5})$$

where  $G_{M_{18}B_{18}O_{17}}$  represents the Gibbs free energy of  $M_2B_2O_2$  with one oxygen vacancy in a  $3 \times 3 \times 1$  supercell. In this work, the values of  $\Delta G_f^{Va}$  for all the 18  $M_2B_2O_2$  are positive, implying that the formation of oxygen vacancy on all the 18  $M_2B_2O_2$  are non-spontaneous. Smaller value of  $\Delta G_f^{Va}$  indicates harder formation of oxygen vacancy of  $M_2B_2O_2$ .

## ■ Figures

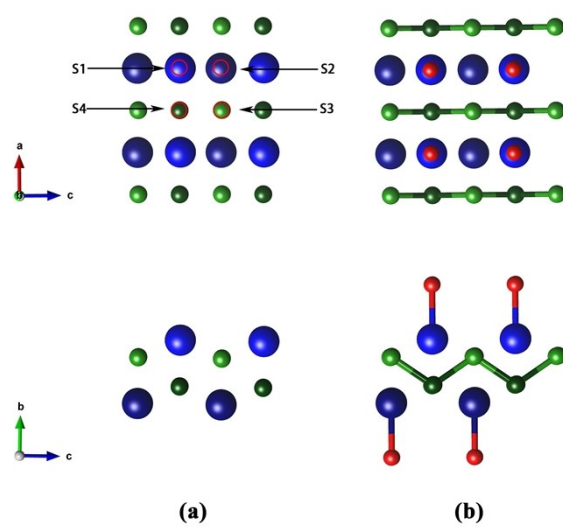

**Fig. S1** (a) four different sites for O adsorption, S1, S2, S3 and S4; (b) type IV structure for ortho-M<sub>2</sub>B<sub>2</sub>O<sub>2</sub>. The light blue, dark blue, light green, dark green and red balls represent upper M atom, lower M atom, upper B atom, lower B atom and O atom, respectively.

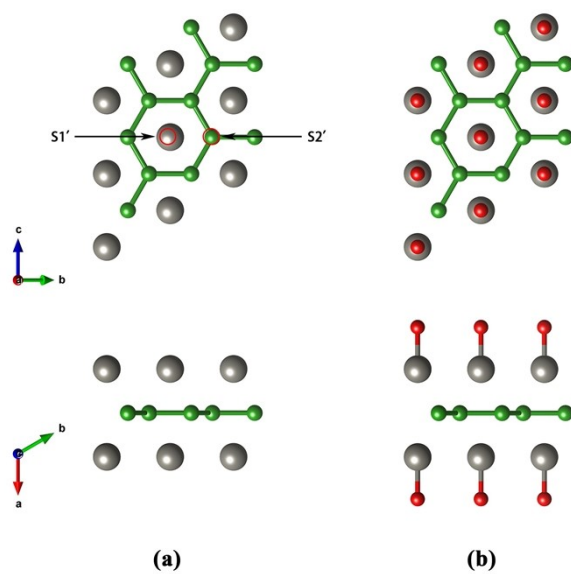

**Fig. S2** (a) two different sites for O adsorption, S1' and S2'; (b) type C structure for hex-M<sub>2</sub>B<sub>2</sub>O<sub>2</sub>. The grey, green and red balls represent M atom, B atom and O atom, respectively.

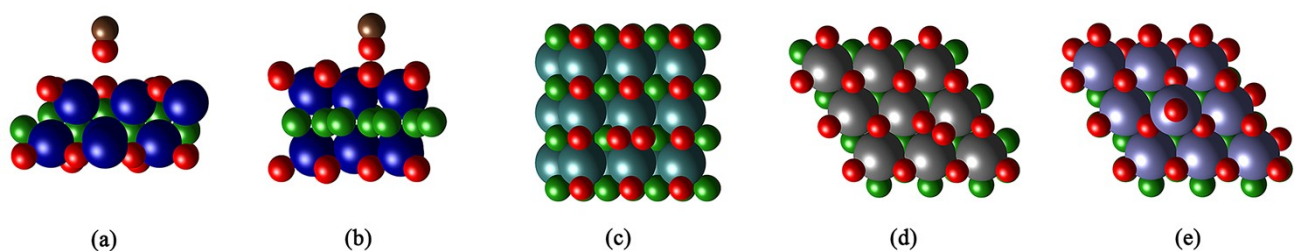

**Fig. S3** Structures of (a) orth- $\text{Cr}_2\text{B}_2\text{O}_2*\text{CO}$ , (b) hex- $\text{Cr}_2\text{B}_2\text{O}_2*\text{CO}$ , (c) orth- $\text{Ta}_2\text{B}_2\text{O}_2*\text{O}_2$ , (d) hex- $\text{Zr}_2\text{B}_2\text{O}_2*\text{O}_2$  and (e) hex- $\text{Hf}_2\text{B}_2\text{O}_2*\text{O}_2$ . Red, brown, green, blue, cyan, gray and purple balls represent oxygen, carbon, boron, tantalum, zirconium and hafnium atoms, respectively.

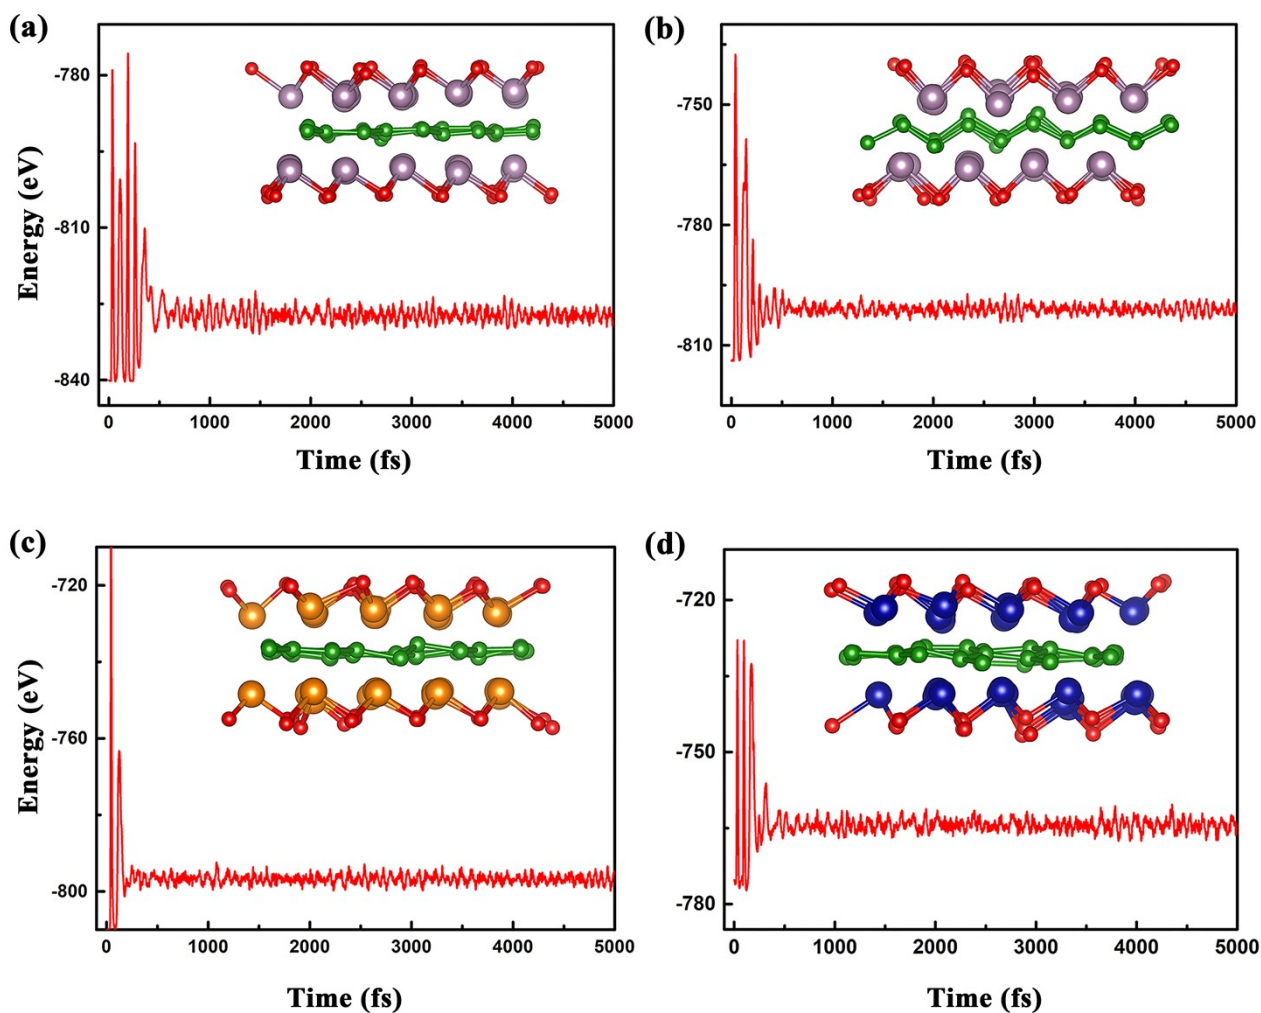

**Fig. S4** AIMD simulations of energy versus time of (a) hex- $\text{Mo}_2\text{B}_2\text{O}_2$ , (b) orth- $\text{Mo}_2\text{B}_2\text{O}_2$ , (c) hex- $\text{V}_2\text{B}_2\text{O}_2$  and (d) hex- $\text{Cr}_2\text{B}_2\text{O}_2$  for 10 ps under 1000 K. The insets represent the corresponding structures.

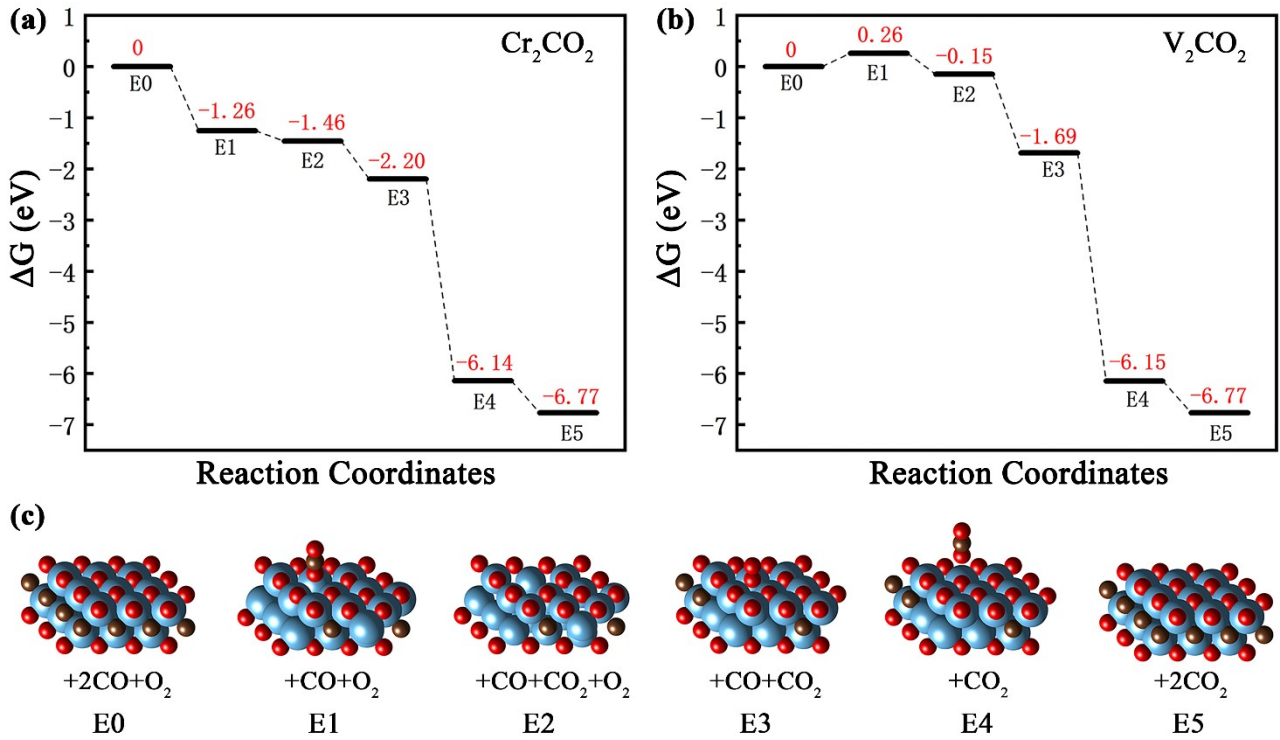

**Fig. S5** Gibbs free energy change for COOR catalysis on (a)  $\text{Cr}_2\text{CO}_2$  and (b)  $\text{V}_2\text{CO}_2$ . (c) Structures of the reaction systems at states E0 to E5.

## ■ Tables

**Table S1.** Entropy of O<sub>2</sub>, CO and CO<sub>2</sub> gas at 298 K and 1 bar

|               | O <sub>2</sub> | CO     | CO <sub>2</sub> |
|---------------|----------------|--------|-----------------|
| S (J/mol * K) | 205.15         | 197.66 | 213.79          |

**Table S2.** Oxygen termination formation energy ( $\Delta G_f^{\text{O}}$ ) and oxygen vacancy formation energy ( $\Delta G_f^{\text{Va}}$ )

|                         |      | Ti     | V     | Cr    | Zr     | Nb     | Mo    | Hf     | Ta     | W     |
|-------------------------|------|--------|-------|-------|--------|--------|-------|--------|--------|-------|
| $\Delta G_f^{\text{O}}$ | Orth | -9.41  | -7.79 | -6.71 | -9.82  | -9.03  | -7.47 | -10.36 | -9.74  | -8.38 |
| (eV)                    | Hex  | -11.40 | -9.92 | -6.28 | -11.68 | -10.86 | -9.00 | -12.22 | -11.07 | -9.19 |

|                   |      |      |      |      |      |      |      |      |      |      |
|-------------------|------|------|------|------|------|------|------|------|------|------|
| $\Delta G_f^{Va}$ | Orth | 4.62 | 2.90 | 2.55 | 5.00 | 4.12 | 2.99 | 5.36 | 4.75 | 3.60 |
| (eV)              | Hex  | 4.70 | 3.75 | 2.32 | 5.22 | 4.79 | 4.03 | 5.59 | 5.04 | 4.34 |

**Table S3.** O-O bond length ( $\Delta d$ ) and the number of electrons that O<sub>2</sub> molecule obtains from the substrates ( $N_e$ ).

|                |      | Ti   | V    | Cr   | Zr   | Nb   | Mo   | Hf   | Ta   | W    |
|----------------|------|------|------|------|------|------|------|------|------|------|
| $\Delta d$ (Å) | Orth | 1.36 | 1.29 | 1.35 | 1.39 | 1.34 | 1.30 | 1.40 | 1.49 | 1.32 |
|                | Hex  | 1.37 | 1.33 | 1.32 | 1.45 | 1.37 | 1.34 | 3.19 | 1.40 | 1.36 |
| $N_e$          | Orth | 0.89 | 0.54 | 0.82 | 1.03 | 0.77 | 0.57 | 1.05 | 1.12 | 0.69 |
|                | Hex  | 0.96 | 0.72 | 0.67 | 1.23 | 0.93 | 0.77 | 2.31 | 1.03 | 0.86 |

**Table S4.** Gibbs free energy change for the formation of the first CO<sub>2</sub> ( $\Delta G_2 + \Delta G_3$ ).

|                           |      | Ti    | V     | Cr    | Zr    | Nb    | Mo    | Hf    | Ta    | W     |
|---------------------------|------|-------|-------|-------|-------|-------|-------|-------|-------|-------|
| $\Delta G_2 + \Delta G_3$ | Orth | -5.51 | -4.46 | -4.49 | -5.72 | -5.46 | -4.52 | -5.88 | -4.30 | -4.95 |
|                           | (eV) | Hex   | -5.07 | -5.02 | -4.67 | -4.20 | -5.48 | -5.24 | -1.63 | -5.71 |

**Table S5.** Gibbs free energy change for the adsorption of the second CO ( $\Delta G_4$ ) and the desorption of the second CO<sub>2</sub> ( $\Delta G_5$ ). The bold figures represent the largest Gibbs free energy for COOR ( $\Delta G_{max}$ ).

|                   |      | Ti          | V           | Cr           | Zr          | Nb          | Mo          | Hf          | Ta          | W           |
|-------------------|------|-------------|-------------|--------------|-------------|-------------|-------------|-------------|-------------|-------------|
| $\Delta G_4$ (eV) | Orth | <b>1.32</b> | -0.59       | -0.56        | <b>1.53</b> | <b>0.58</b> | -0.60       | <b>1.89</b> | <b>1.25</b> | <b>0.27</b> |
|                   | Hex  | <b>1.22</b> | <b>0.39</b> | -0.87        | <b>1.83</b> | <b>1.50</b> | <b>0.85</b> | <b>2.35</b> | <b>1.96</b> | <b>1.06</b> |
| $\Delta G_5$ (eV) | Orth | -0.08       | <b>0.10</b> | <b>-0.28</b> | 0.08        | 0.15        | <b>0.20</b> | 0.08        | 0.12        | -0.06       |
|                   | Hex  | 0.09        | -0.02       | <b>-0.20</b> | 0.01        | -0.09       | -0.21       | -0.14       | -0.30       | -0.10       |
